# Supplementary material for: Synthesis and Characterization of Amine and Aldehyde-Containing Copolymers for Enzymatic Crosslinking of Gelatine
Source: MDPI journal article supplement (doi:10.3390/ijms25052897), 2024-03-01
Supplement: s1 [file s1]

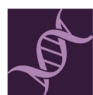

Supplementary Materials

# Synthesis and Characterization of Amine and Aldehyde-Containing Copolymers for Enzymatic Crosslinking of Gelatine

Silvana Alfei \*, Federica Pintaudi and Guendalina Zuccari

Department of Pharmacy (DIFAR), University of Genoa, Viale Cembrano, 4, 16148 Genoa, Italy

\* Correspondence: alfei@difar.unige.it

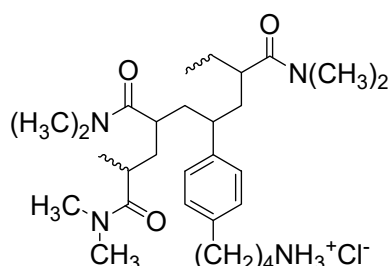

Figure S1. Linear LO substrate copolymer (P1c) previously prepared by us of interest for this new study.

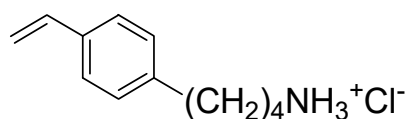

(a)

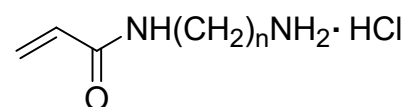

11a (n=2), 11b (n=4), 11c (n=6)

(b)

Figure S2. Chemical structure of monomer 5 (a); chemical structure of amidoamine monomers 11a-c (b).

Table S1. Copolymerization of 5 with DMAA at 60 °C.

| 5<br>(mg, mmol) | DMAA<br>(g, mmol) | M <sub>5</sub> | AIBN<br>(mg, %) | DMF<br>(mL) | Time<br>(h) | Isolation solvent | Copolymer<br>(g, %)            |
|-----------------|-------------------|----------------|-----------------|-------------|-------------|-------------------|--------------------------------|
| 50.4, 0.238     | 2.5, 25.23        | 0.009          | 25.9, 1.02      | 11.0        | 3 h 30'     | DIPE              | CP5/DMAA-0.9 *<br>2.07, 80.9   |
| 75.4, 0.356     | 2.31, 23.29       | 0.015          | 24.7, 1.04      | 11.0        | 3 h 30'     | DIPE              | CP5/DMAA-1.5 *<br>1.74, 72.9   |
| 155.4, 0.734    | 1.38, 13.95       | 0.052          | 15.8, 1.03      | 7.1         | 24          | Et <sub>2</sub> O | CP5/DMAA-5.2 *<br>0.53, 34.4   |
| 151.2, 0.714    | 0.637, 6.43       | 0.111          | 7.9, 1.00       | 3.6         | 24          | Et <sub>2</sub> O | CP5/DMAA-11.1 *<br>0.504, 63.9 |
| 101.4, 0.479    | 0.421, 4.25       | 0.113          | 5.99, 1.15      | 3.0         | 24          | Et <sub>2</sub> O | CP5/DMAA-11.3 *<br>0.117, 22.3 |
| 698.0, 3.295    | 0.766, 7.73       | 0.426          | 15.3, 1.05      | 7.5         | 7           | Et <sub>2</sub> O | CP5/DMAA-42.6 *<br>0.678, 46.3 |
| 953.0, 4.50     | 1.04, 10.48       | 0.429          | 21.3, 1.07      | 9.5         | 24          | Et <sub>2</sub> O | CP5/DMAA-42.9 *<br>0.860, 81.4 |
| 811.0, 3.83     | 0.88, 8.88        | 0.431          | 17, 1.01        | 8.0         | 21          | Et <sub>2</sub> O | CP5/DMAA-43.1 *<br>0.599, 35.4 |

DMAA = *N*, *N*'-dimethylacrylamide;  $M_5$  = molar fraction of **5** in the feed; AIBN = 2,2'-azobis-(2-methyl-propionitrile); DIPE = di-isopropyl ether; \* the copolymer code number indicates the percentage of **5** in the polymerization feed.

**Table S2.** Results from characterization analyses performed on CP5/DMAA-42.9.

| Entry         | $\mu\text{equivNH}_2/\text{g}$ * | Mn   | $Z_{\text{AVE}}$ (nm) | $\zeta\text{-p}$ (mV) | PDI               | $\text{mmolNH}_2/\text{g}$ ** | $\beta$ | $\beta_{\text{AVE}}$ |
|---------------|----------------------------------|------|-----------------------|-----------------------|-------------------|-------------------------------|---------|----------------------|
| CP5/DMAA-42.9 | 894 $\pm$ 12                     | 5100 | 334 $\pm$ 27          | +57.6 $\pm$ 1.7       | 1.012 $\pm$ 0.007 | 12.5 $\pm$ 0.03               | 0.667   | 0.2305 $\pm$ 0.1354  |

\* Volumetric titration; \*\* potentiometric titrations; PDI = polydispersion index. AVE = average;  $\beta$  = buffer capacity ( $\text{dV}_{(\text{HCl})}/\text{d}(\text{pH})$ );  $\beta_{\text{AVE}}$  = average buffer capacity. Defined as the volume of HCl necessary to cause a variation of pH equal to one unit in the pH range 4.5–7.5.

**Table S3.** Solubility of DMAA homopolymer (HP-DMAA) and of prepared copolymers using **5**, DMAA and AA.

| Solvent           | CP5/DMMA-1.5 *    | CP5/DMAA-42.9 *   | CP5/DMMA/AA       | HP-DMAA            |
|-------------------|-------------------|-------------------|-------------------|--------------------|
| Petrol            | -                 | -                 | -                 | -                  |
| Et <sub>2</sub> O | -                 | -                 | -                 | -                  |
| Toluene           | Swells on heating | Swells on cooling | -                 | Partially soluble  |
| THF               | Partially soluble | Partially soluble | -                 | Soluble on heating |
| Dioxane           | Swells on cooling | Swells on cooling | -                 | Soluble on heating |
| Acetone           | Partially soluble | -                 | -                 | +                  |
| CHCl <sub>3</sub> | +                 | -                 | Partially soluble | +                  |
| DCM               | +                 | -                 | Swells on cooling | +                  |
| MeOH              | +                 | +                 | +                 | +                  |
| DMF               | +                 | +                 | +                 | +                  |
| DMSO              | +                 | +                 | +                 | Soluble on heating |
| H <sub>2</sub> O  | +                 | +                 | +                 | +                  |

Petrol = petroleum ether 40–60 °C; DMAA = *N*, *N*'-dimethylacrylamide; AA = acrylic acid; THF = tetrahydrofuran; DCM = dichloromethane; DMF = *N*, *N*-dimethylformamide; DMSO = dimethyl sulfoxide; \* the copolymer code number indicates the percentage of **5** in the feed.

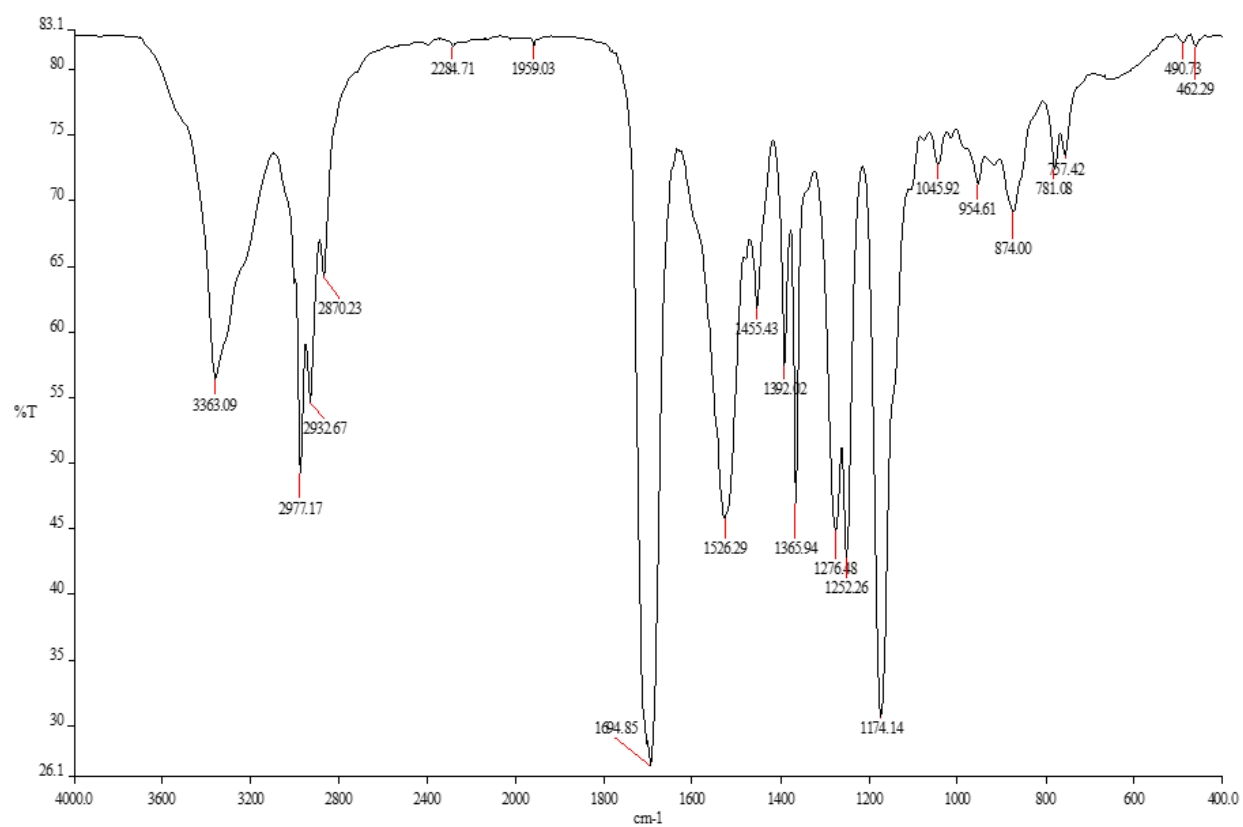

**Figure S3.** FTIR (film) spectrum of 6a.

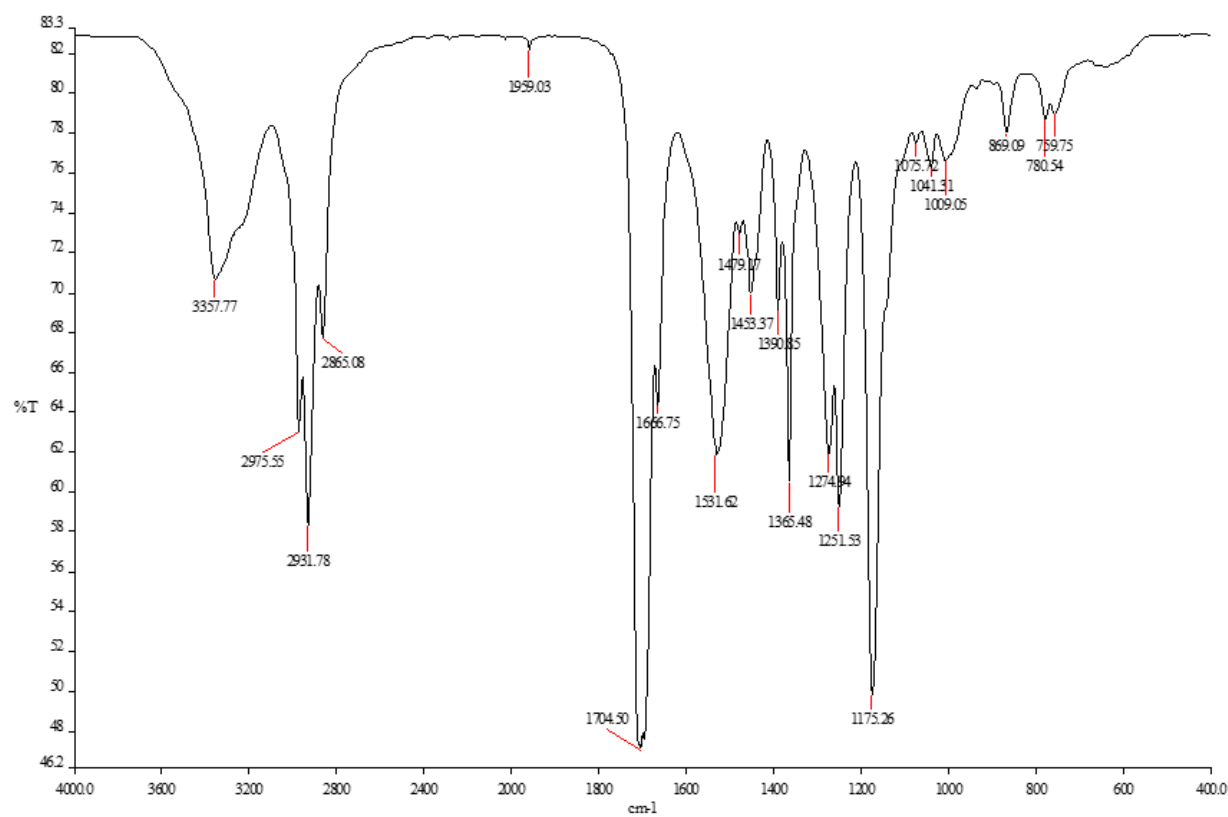

Figure S4. FTIR (film) spectrum of 6b.

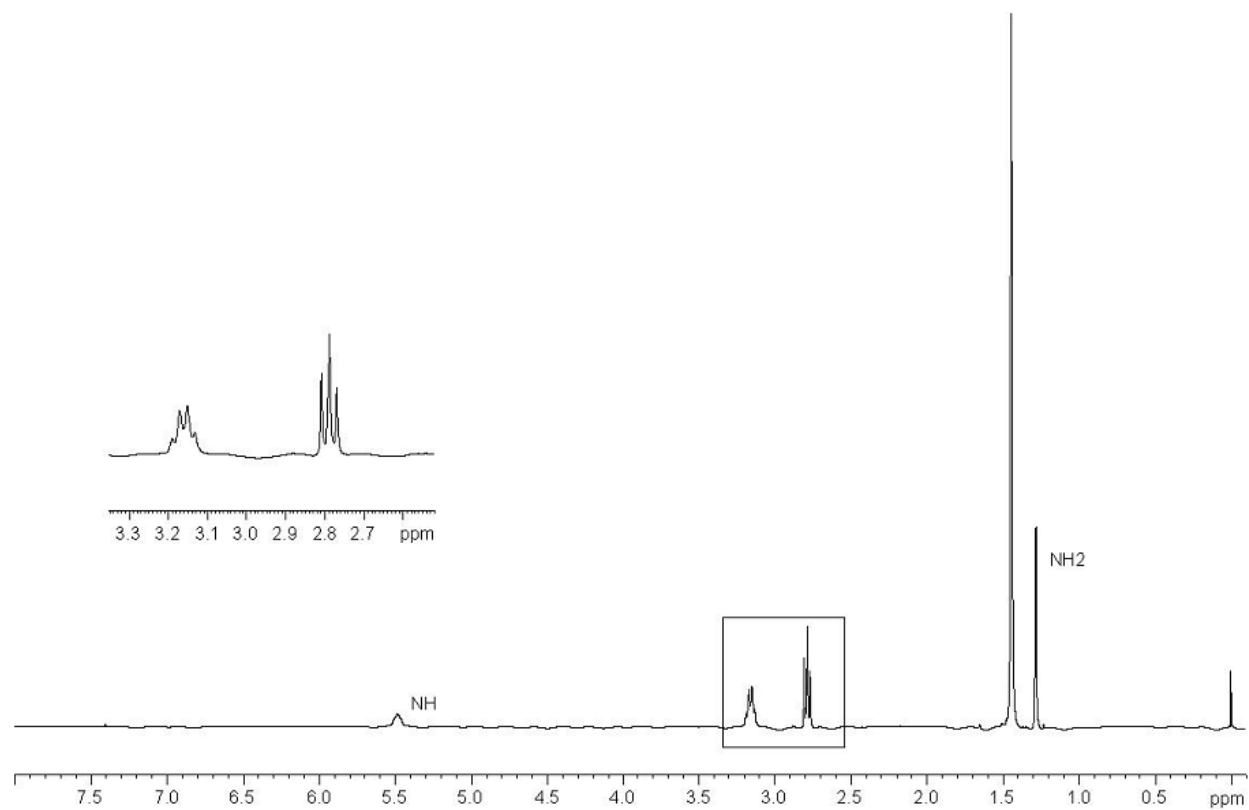

**Figure S5.**  $^1\text{H}$  NMR ( $\text{CDCl}_3$ , 300 MHz) spectrum of **6a**.

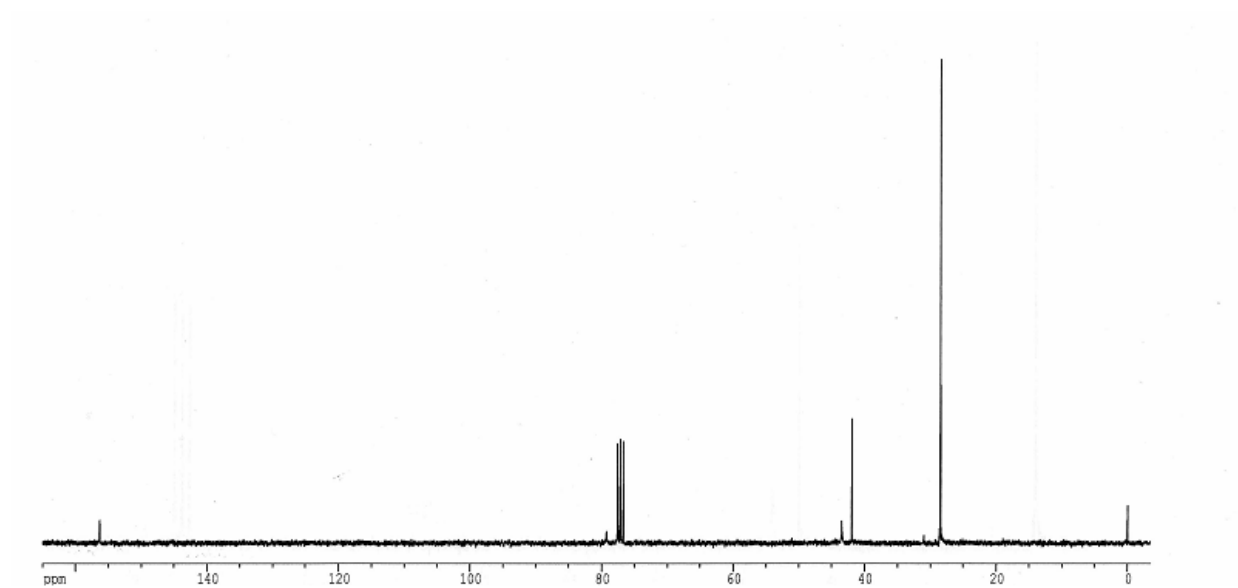

**Figure S6.**  $^{13}\text{C}$  NMR ( $\text{CDCl}_3$ , 75.5 MHz) spectrum of **6a**.

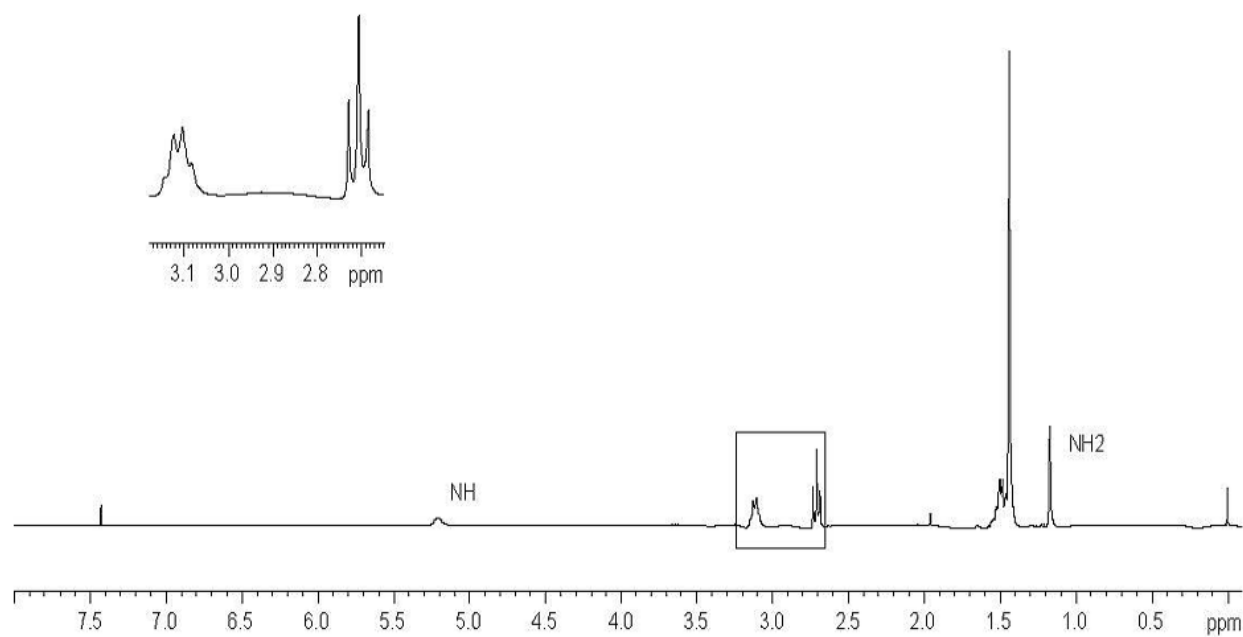

Figure S7. <sup>1</sup>H NMR (CDCl<sub>3</sub>, 300 MHz) spectrum of **6b**.

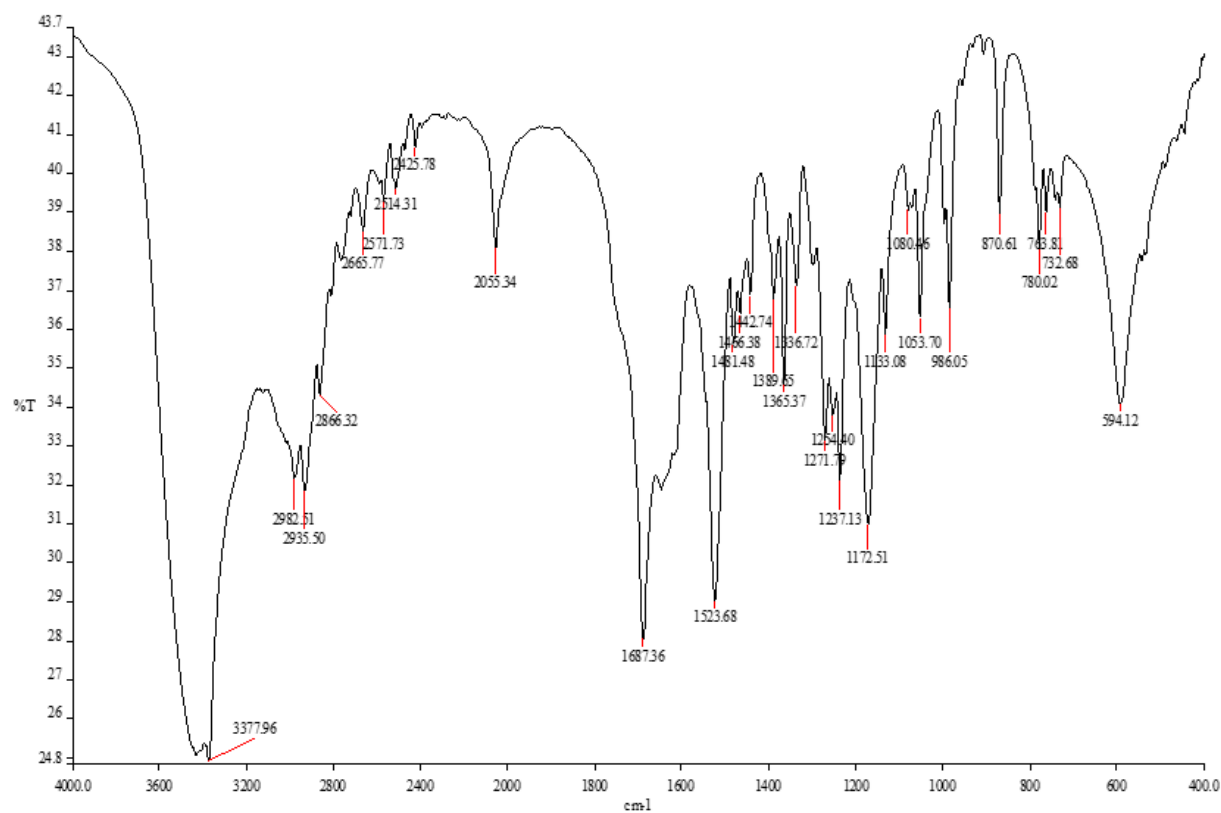

Figure S8. FTIR (KBr) spectrum of the hydrochloride salt of **6c**.

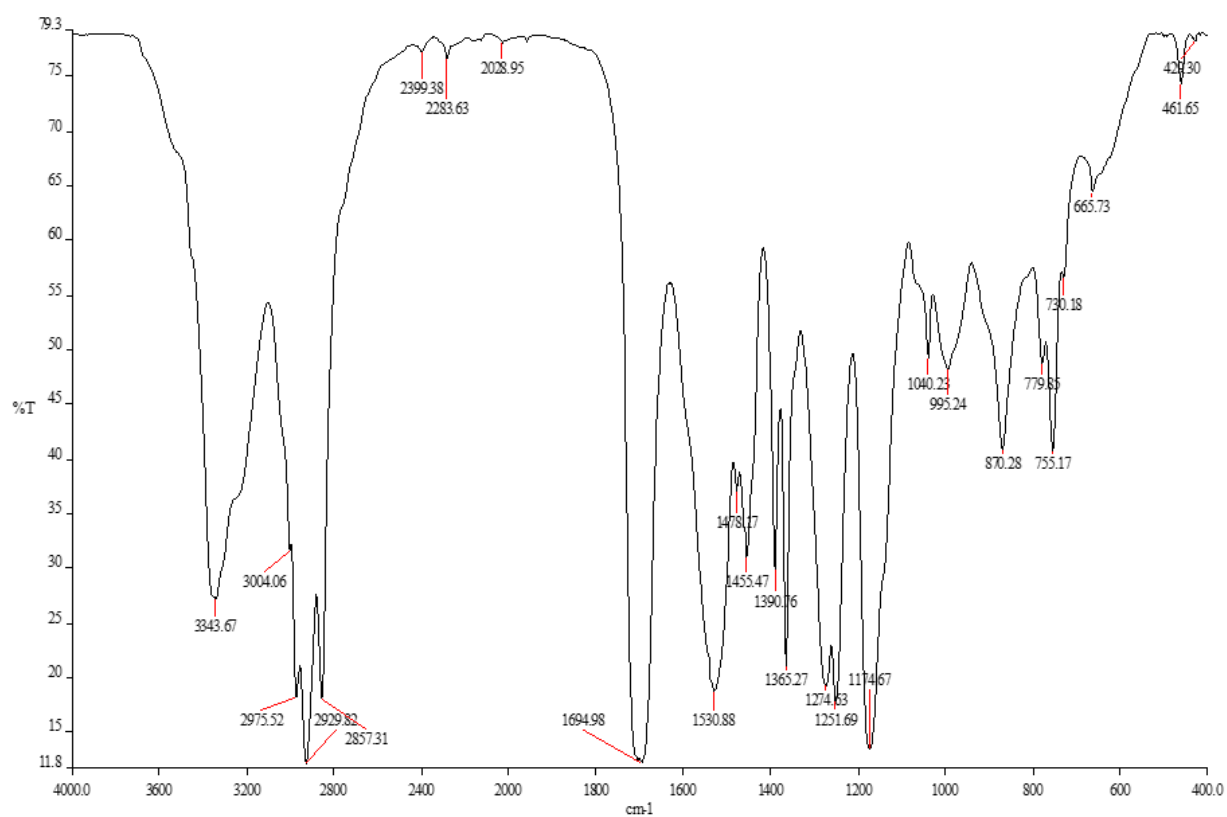

**Figure S9.** FTIR (film) spectrum of 6c.

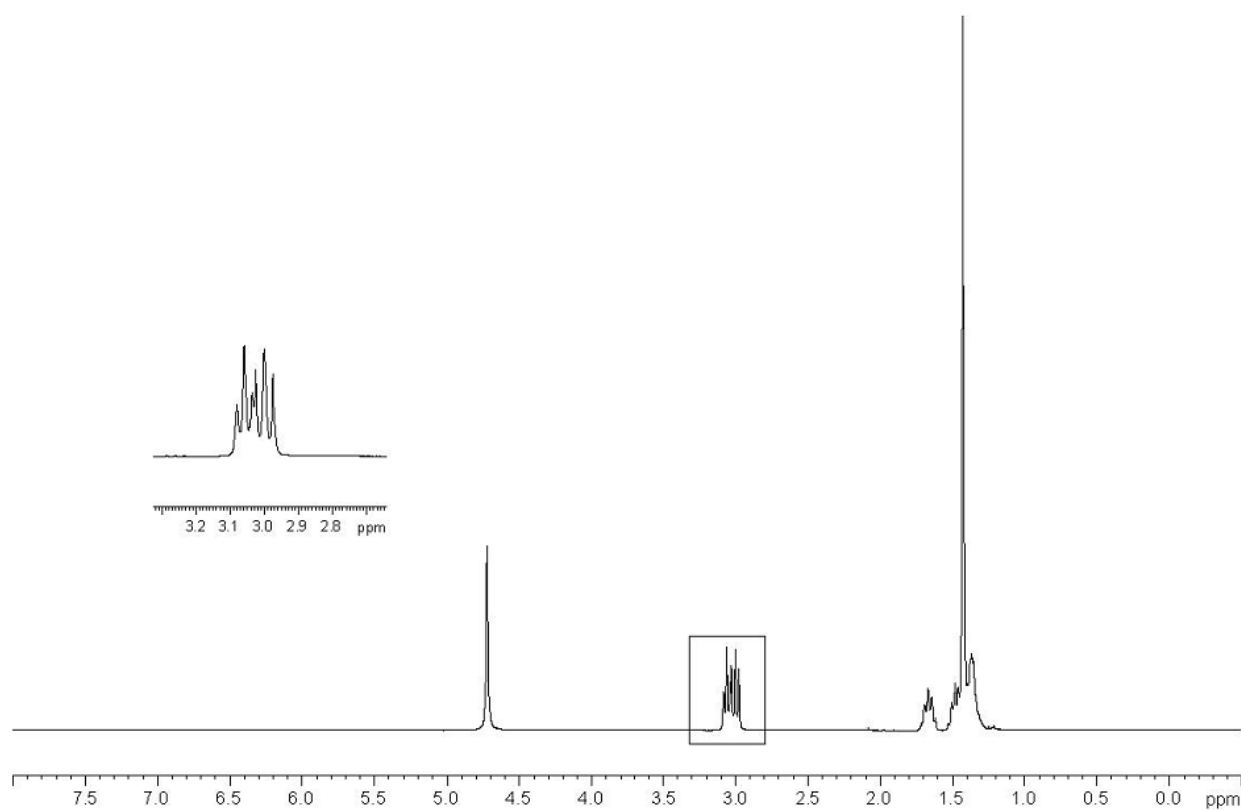

**Figure S10.**  $^1\text{H}$  NMR ( $\text{D}_2\text{O}$ , 300 MHz) spectrum of the hydrochloride salt of **6c**.

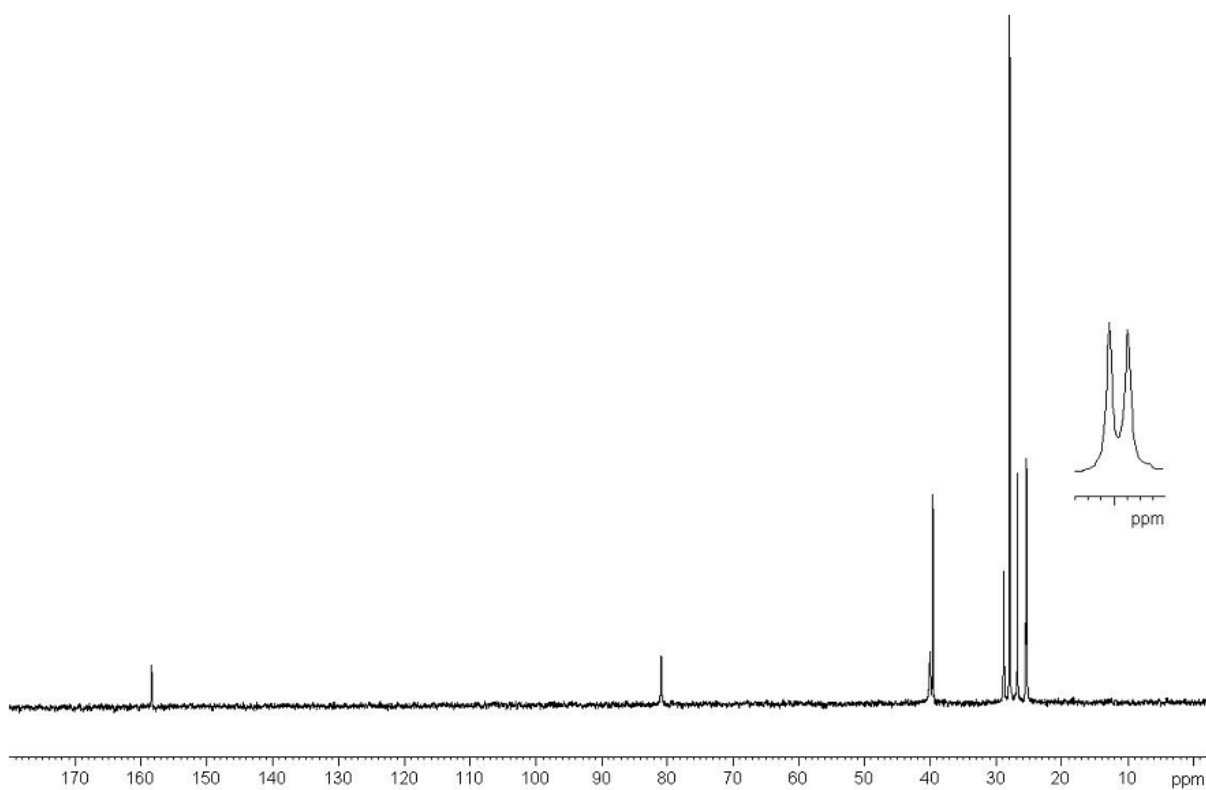

**Figure S11.**  $^{13}\text{C}$  NMR ( $\text{D}_2\text{O}$ , 75.5 MHz) spectrum of the hydrochloride salt of **6c**.



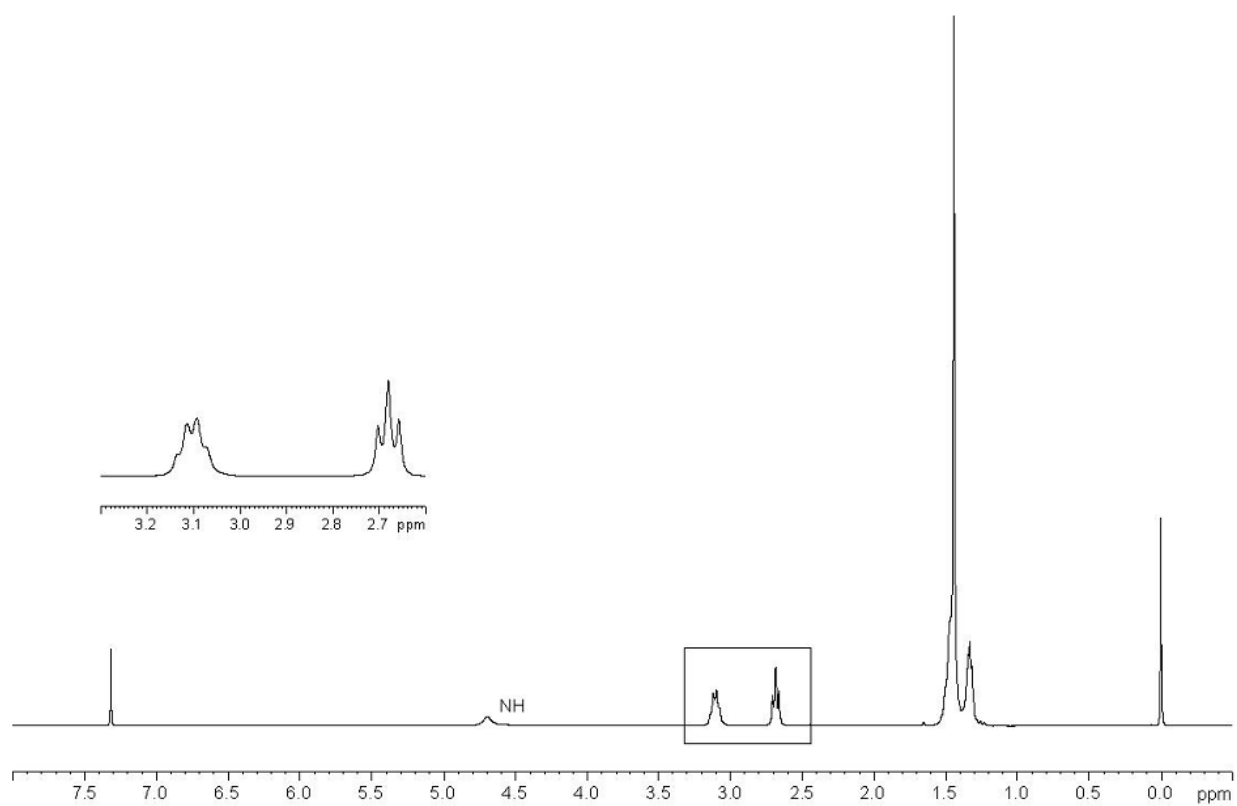

**Figure S12.**  $^1\text{H}$  NMR ( $\text{CHCl}_3$ , 300 MHz) spectrum of **6c**.

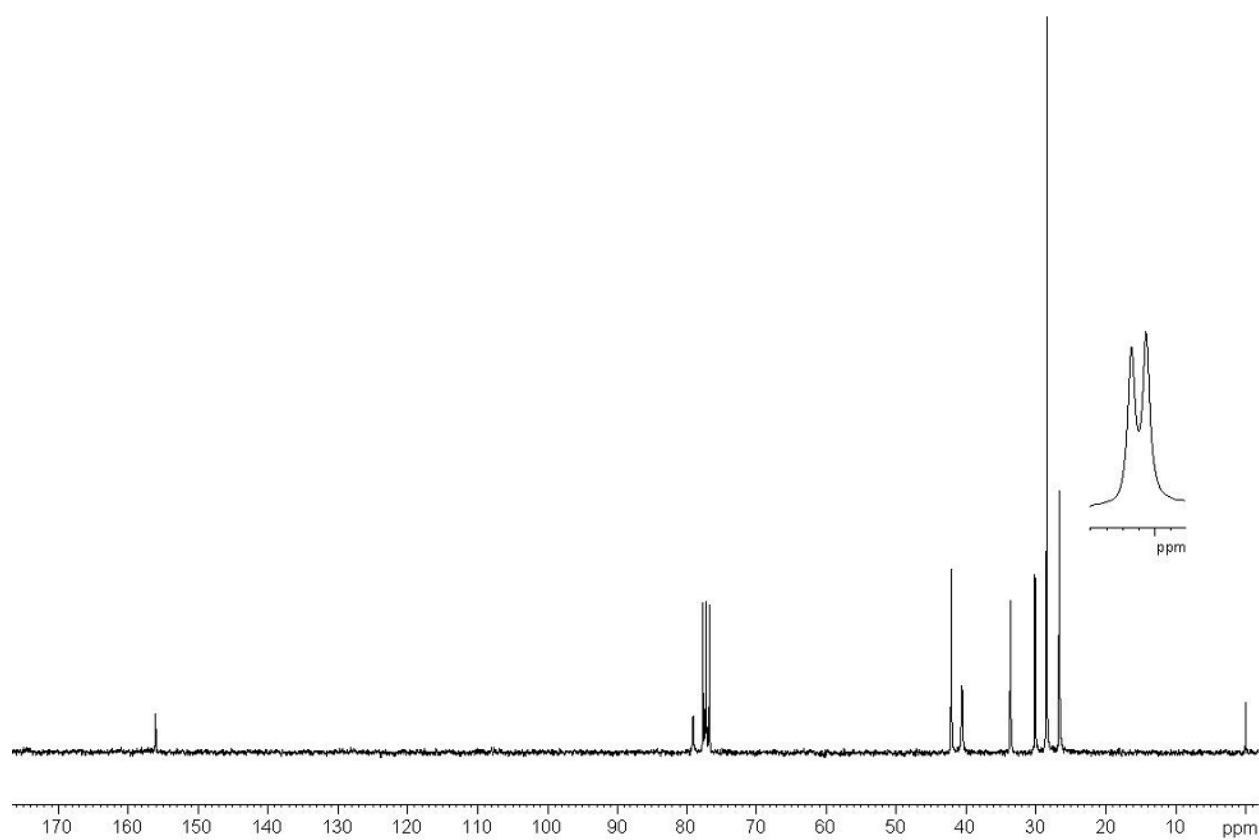

**Figure S13.** <sup>13</sup>C NMR (CHCl<sub>3</sub>, 300 MHz) spectrum of 6c.

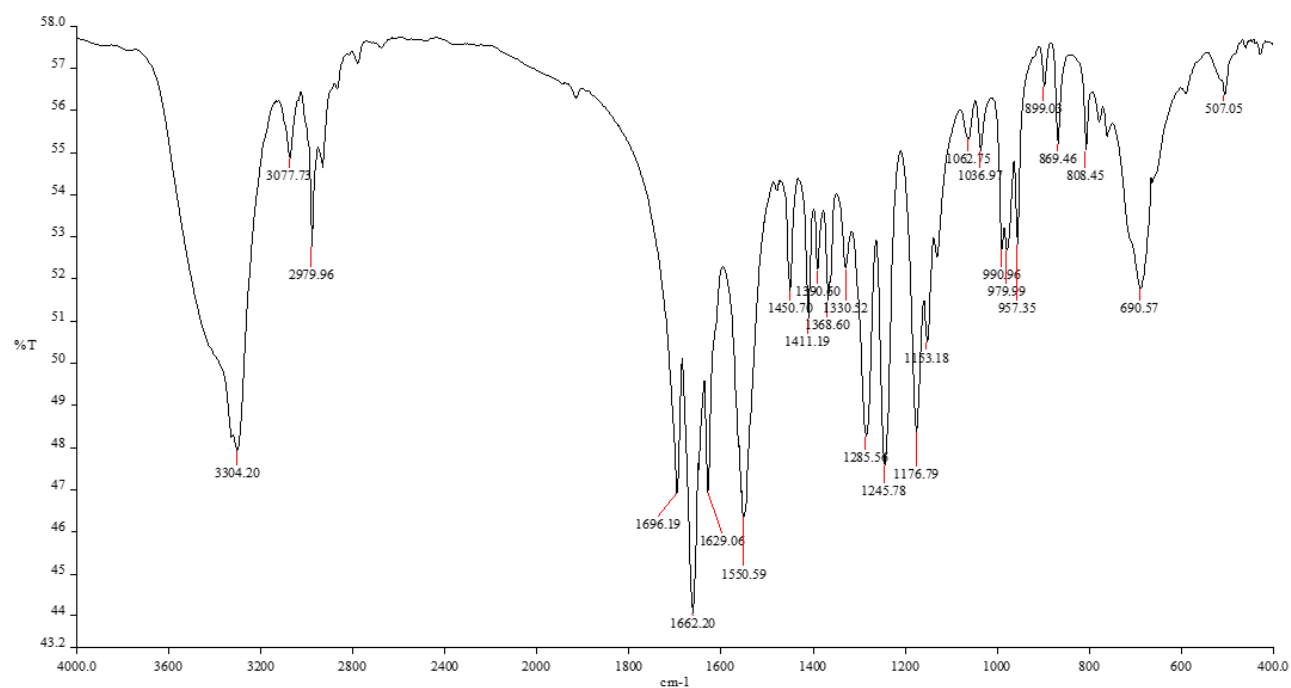

**Figure S14.** FTIR spectrum (KBr) of compound 10a.

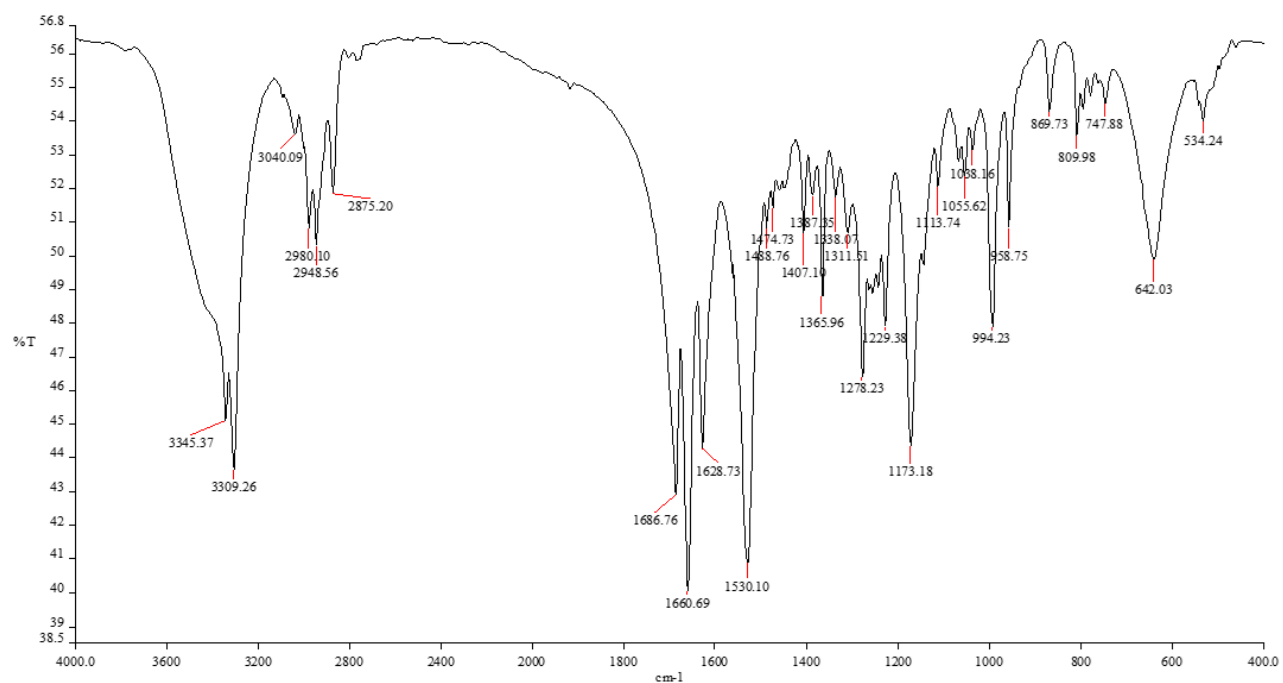

Figure S15. FTIR spectrum (KBr) of compound 10b.

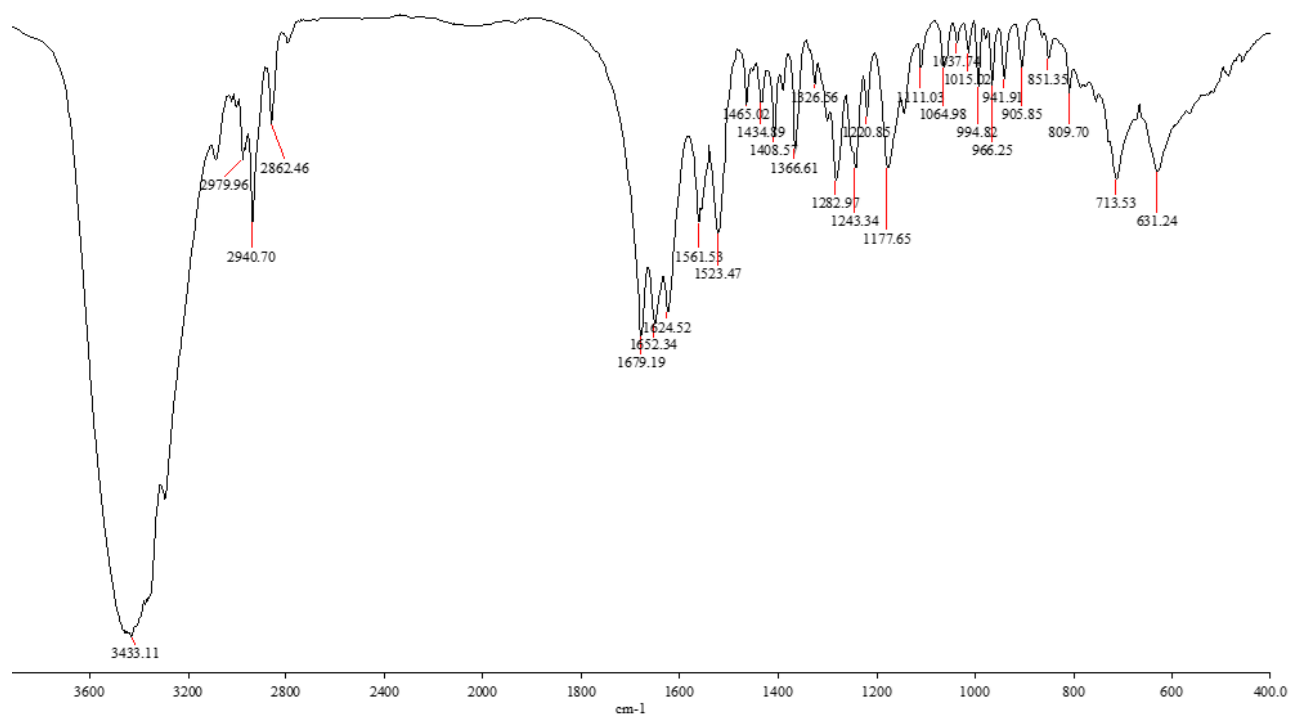

Figure S16. FTIR spectrum (KBr) of compound 10c.

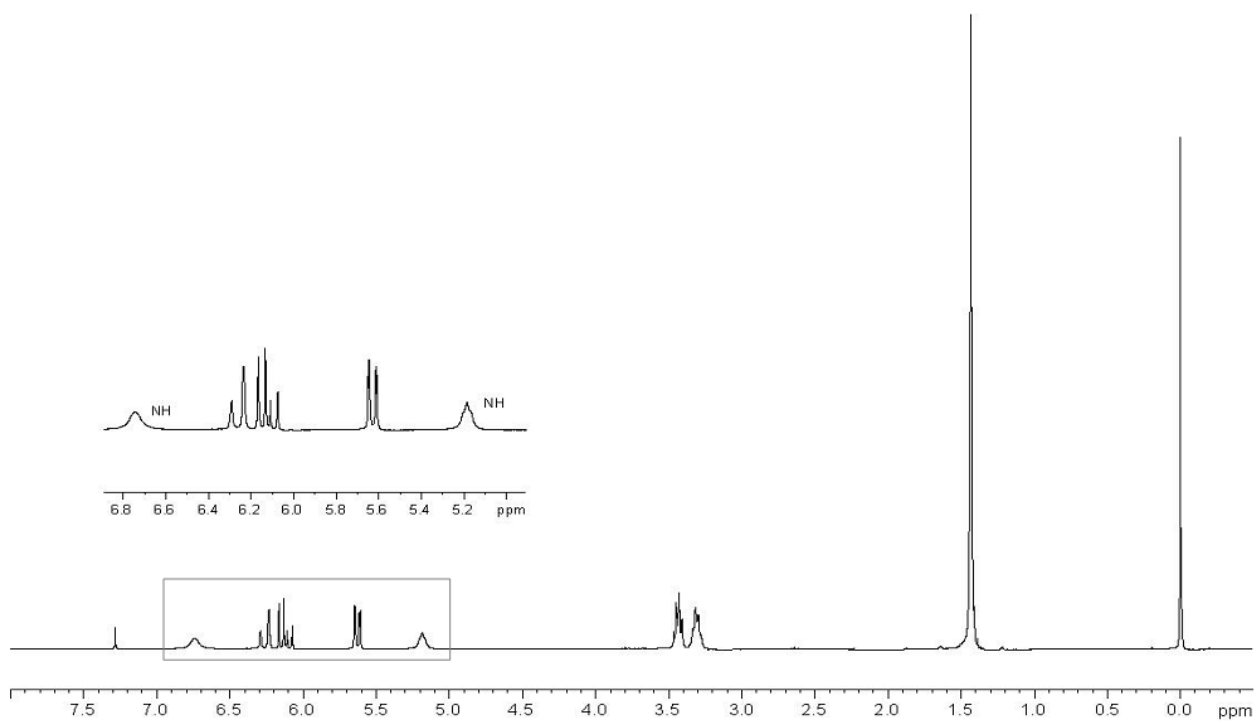

**Figure S17.**  $^1\text{H}$  NMR spectrum ( $\text{CHCl}_3$ , 300 MHz) of compound **10a**.

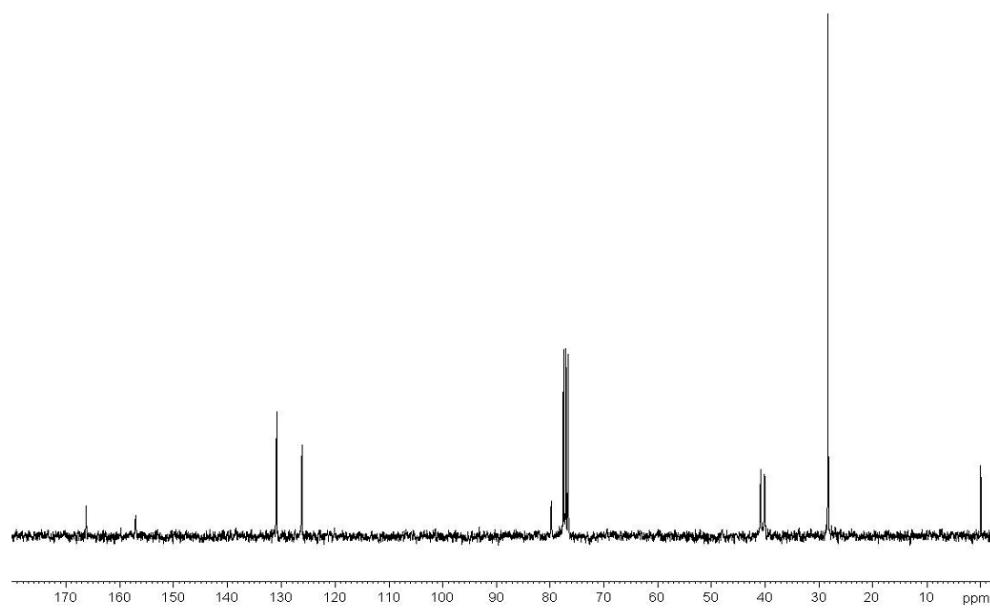

**Figure S18.**  $^{13}\text{C}$  NMR spectrum ( $\text{CHCl}_3$ , 75.5 MHz) of compound **10a**.

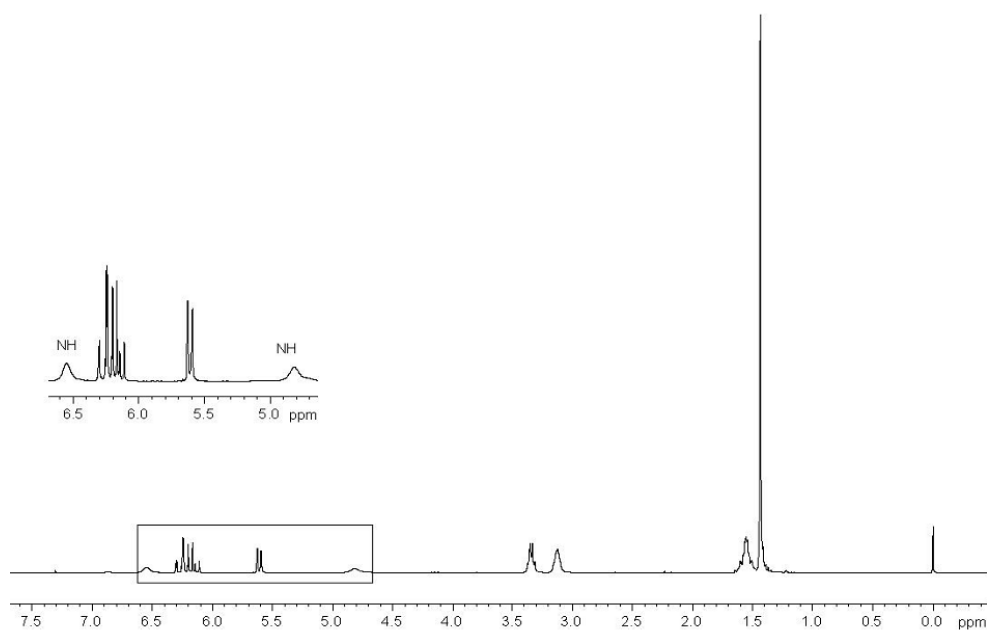

**Figure S19.**  $^1\text{H}$  NMR spectrum ( $\text{CHCl}_3$ , 300 MHz) of compound **10b**.

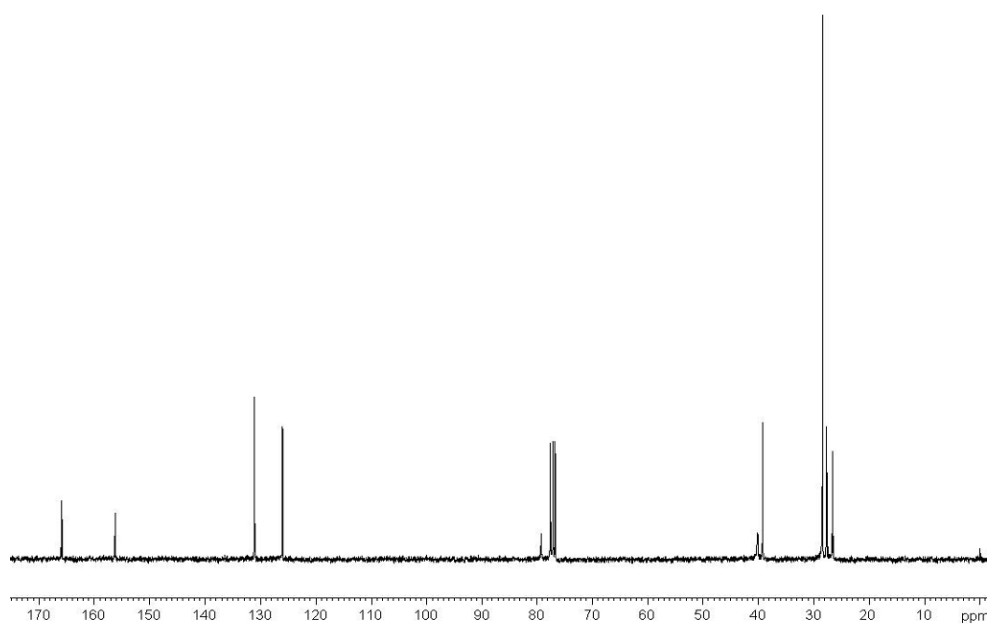

**Figure S20.**  $^{13}\text{C}$  NMR spectrum ( $\text{CHCl}_3$ , 75.5 MHz) of compound **10b**.

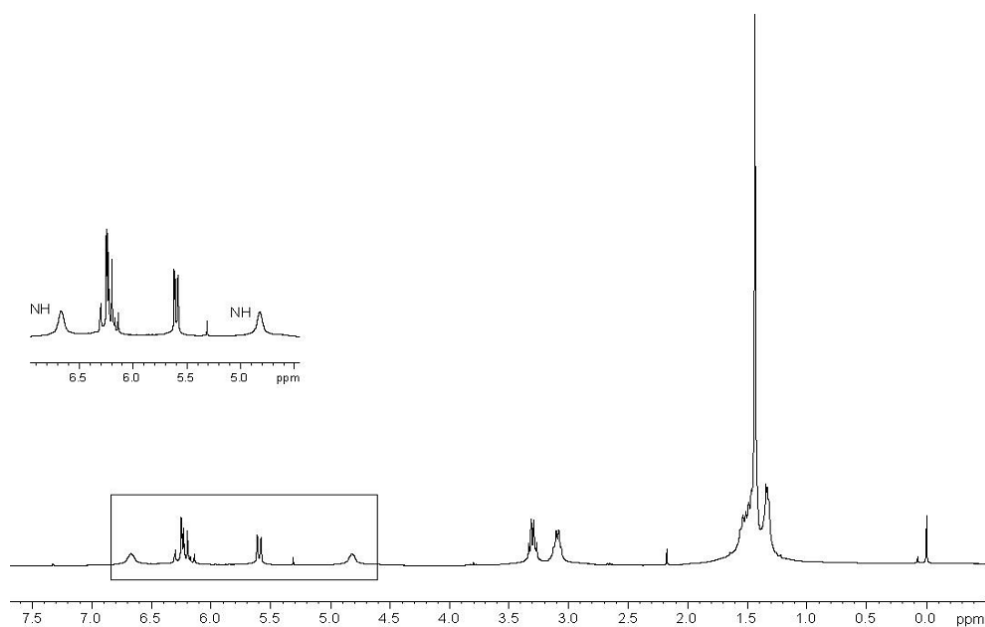

**Figure S21.**  $^1\text{H}$  NMR spectrum ( $\text{CHCl}_3$ , 300 MHz) of compound 10c.

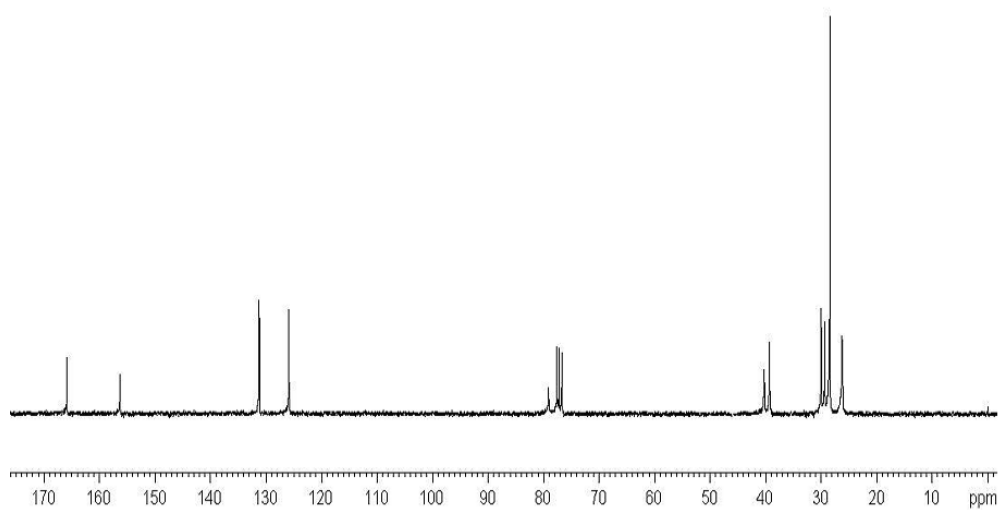

**Figure S22.**  $^{13}\text{C}$  NMR spectrum ( $\text{CHCl}_3$ , 75.5 MHz) of compound 10c.

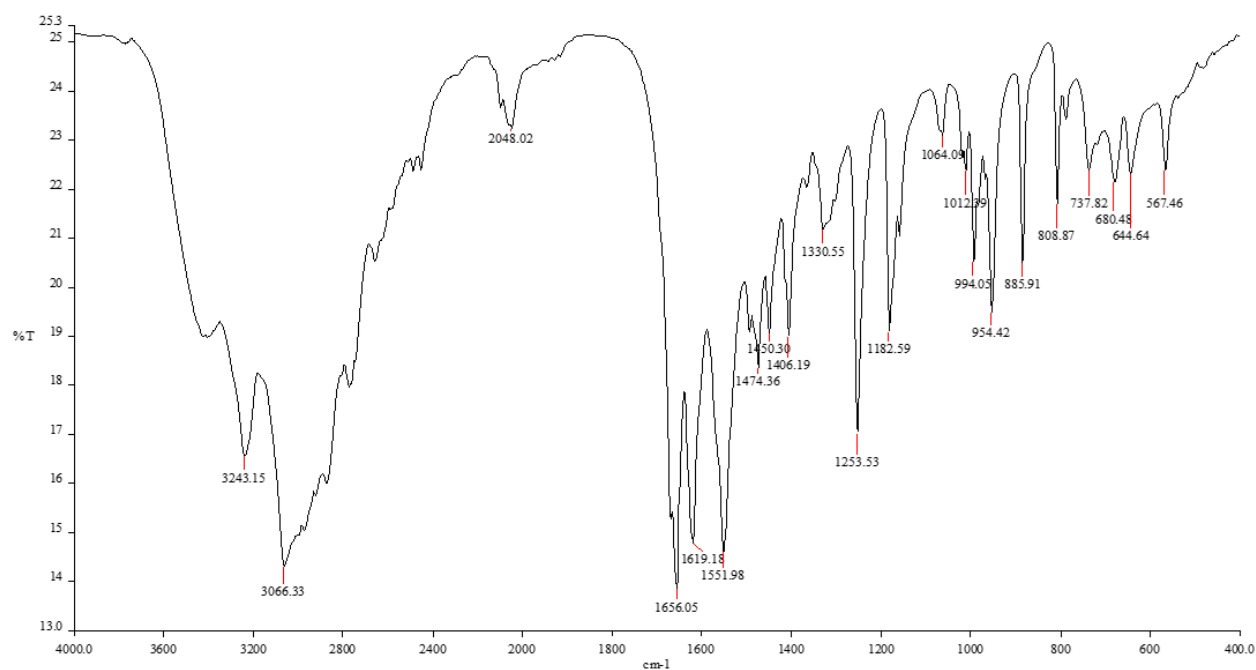

Figure S23. FTIR spectrum (KBr) of compound 11a.

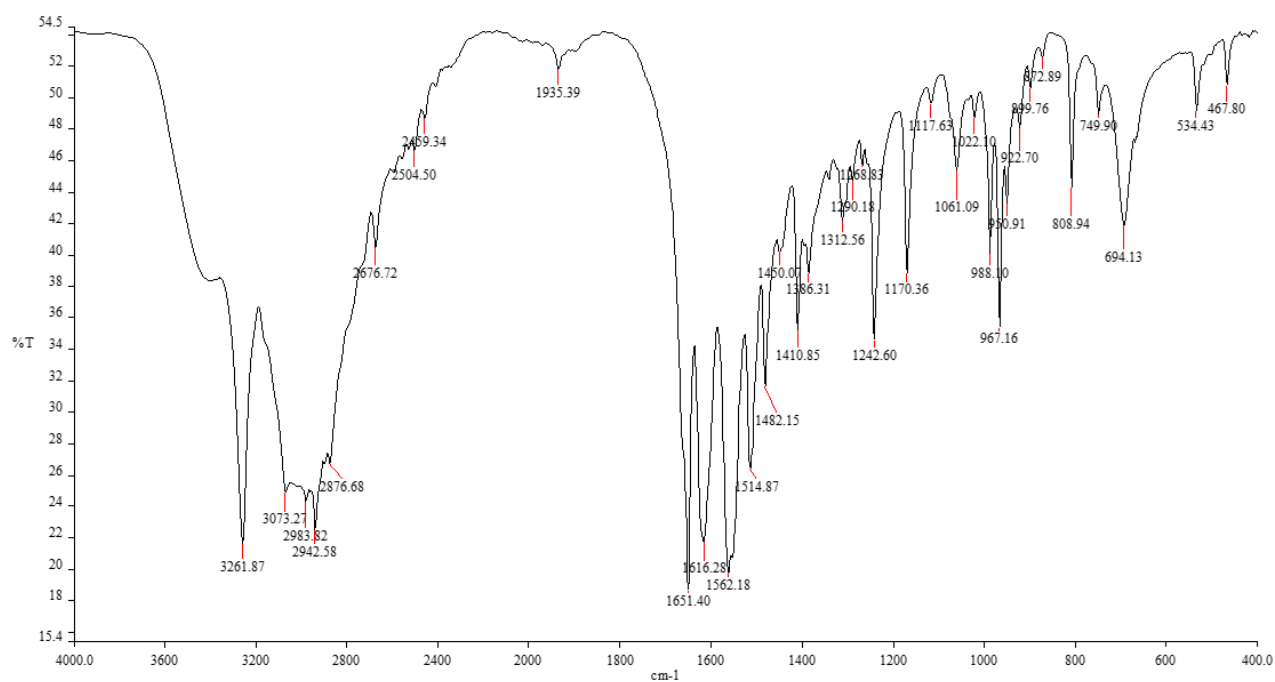

Figure S24. FTIR spectrum (KBr) of compound 11b.

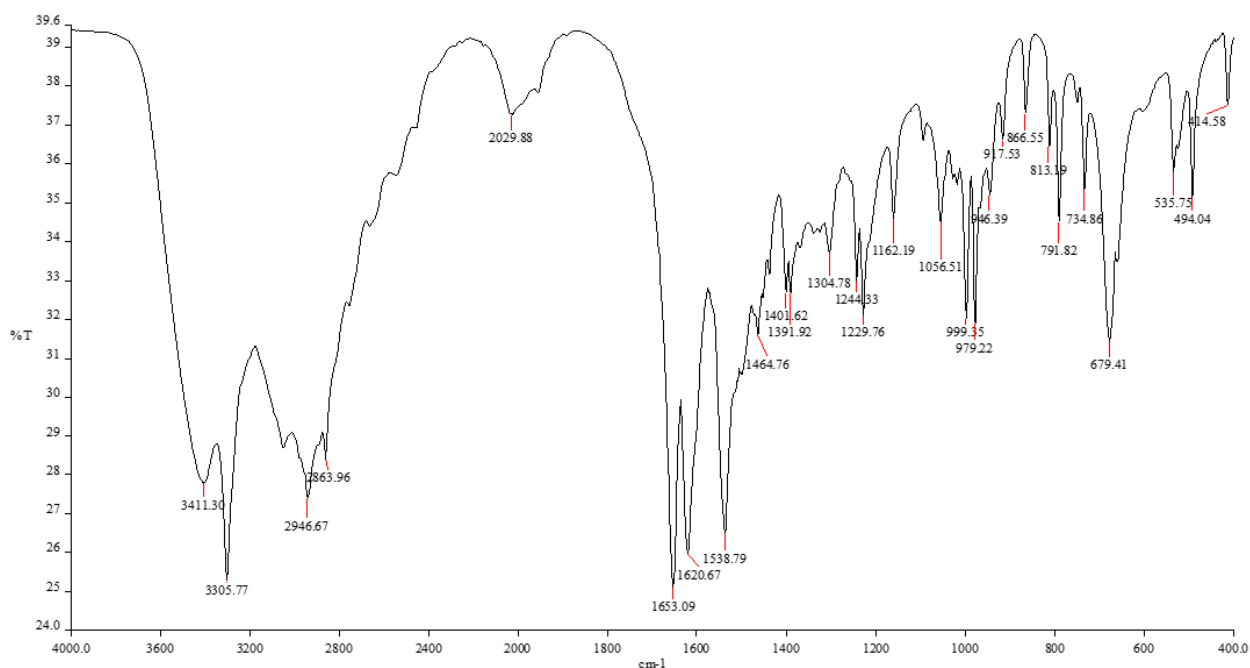

**Figure S25.** FTIR spectrum (KBr) of compound **11c**.

**Table S4.** Solubility of the prepared copolymers and of the DMAA homopolymer prepared for comparison purposes.

| Solvent           | CP10a/DMAA          | CP10b/DMAA          | CP11a/DMAA | CP11b/DMAA | CP11c/DMAA | HP-DMAA           |
|-------------------|---------------------|---------------------|------------|------------|------------|-------------------|
| Petrol            | -                   | -                   | -          | -          | -          | -                 |
| Et <sub>2</sub> O | -                   | -                   | -          | -          | -          | -                 |
| Toluene           | Partially soluble * | Partially soluble * | Swells *   | Swells *   | Swells *   | Partially soluble |
| THF               | +                   | +                   | Swells *   | Swells *   | Swells *   | Soluble *         |
| Dioxane           | +                   | +                   | Swells *   | Swells **  | Swells **  | Soluble *         |
| Acetone           | +                   | +                   | Swells *   | Swells *   | Swells **  | +                 |
| CHCl <sub>3</sub> | +                   | +                   | +          | +          | Soluble *  | +                 |
| DCM               | +                   | +                   | +          | +          | +          | +                 |
| MeOH              | +                   | +                   | +          | +          | +          | +                 |
| DMF               | +                   | +                   | +          | +          | +          | +                 |
| DMSO              | +                   | +                   | +          | +          | +          | +                 |
| H <sub>2</sub> O  | +                   | +                   | +          | +          | +          | +                 |

\* Under heating; \*\* under cooling; petrol = petrol ether boiling at 40–60 °C; DMAA = *N,N'*-dimethylacrylamide; THF = tetrahydrofuran; DCM = dichloromethane; DMF = *N,N*-dimethylformamide; DMSO = dimethyl sulfoxide; HP-DMAA = DMAA homopolymer.

**Table S5.** Main features of commercially available Gel B used in this study.

| Bloom grade (Bloom) | FTIR (cm <sup>-1</sup> ) | NH <sub>2</sub> (mmol/g)          |
|---------------------|--------------------------|-----------------------------------|
| 250                 | 1645, 1540 *             | 0.391± 0.02 **    0.219± 0.03 *** |

\* C=O amides; \*\* acid-base titration; \*\*\* UV determination; Bloom grade = unit of measurement of the solidity of a gel.



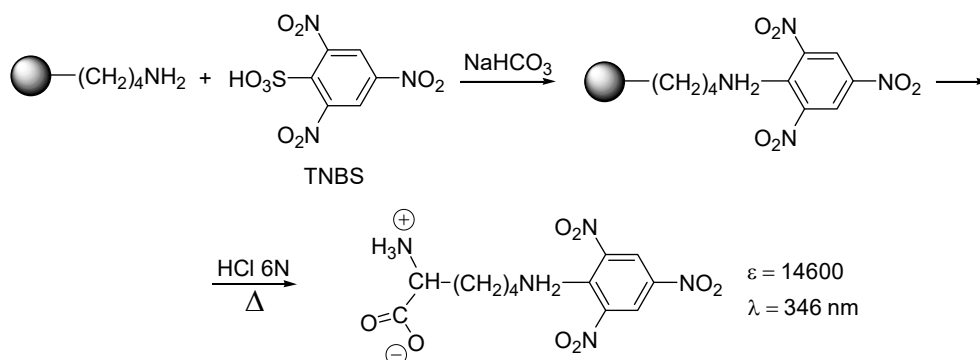

**Scheme S1.** Reaction between gelatine and TNBS leading to the formation of chromophore measurable by UV-Vis analyses.

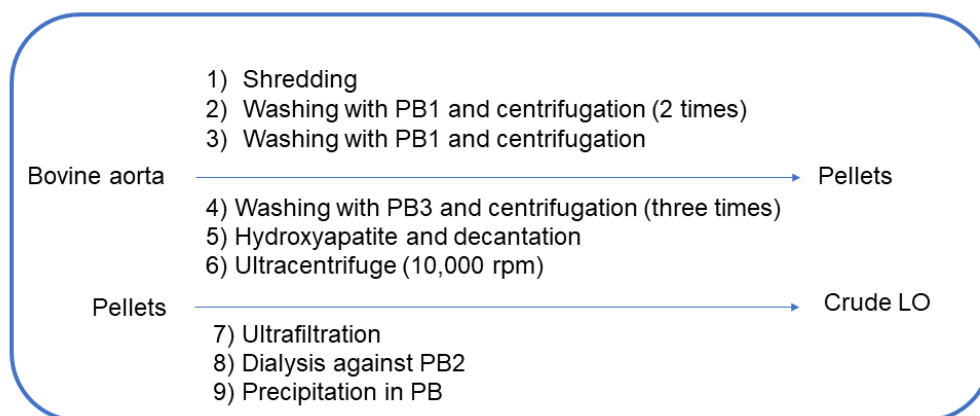

Legend: LO = Lysyl oxidase; PB = 1M potassium phosphate buffer;  
 PB1= buffer 0.4M NaCl, 16mM potassium phosphate (pH=7.8);  
 PB2= 16mM potassium phosphate buffer (pH=7.8);  
 PB3= 4M urea 16mM potassium phosphate buffer (pH=7.8).

**Chart S1.** Main steps of procedure performed to extract and purify LO from bovine aorta.

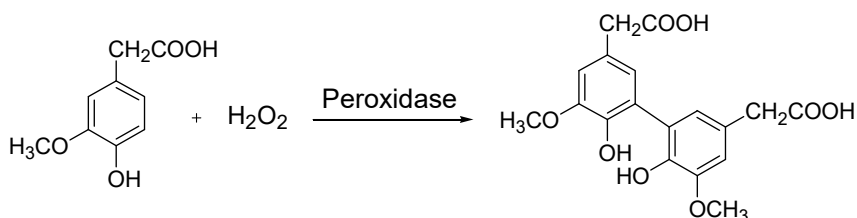

**Scheme S2.** Reaction between homo vanillic acid and hydrogen peroxide in presence of peroxidase leading to the formation of the fluorescent dimer measurable by fluorimetry.

**Table S6.** Oxidation assays of selected copolymers with copper-containing amino oxidases (CAO).

| Entry | Copolymer (mg)            | Solvent (μL)               | CAO (μL)   | CAO stock solution (mg/mL) | Schiff test |
|-------|---------------------------|----------------------------|------------|----------------------------|-------------|
| 1     | HP-DMAA<br>7.1            | H <sub>2</sub> O mQ<br>250 | -          | -                          | -           |
| 2     | CP5/DMAA-43.1 *<br>4.7    | BU6M<br>500                | LO<br>150  | 152.5/1.50<br>BU6M         | +           |
| 3     | CP5/DMAA-43.1 *<br>10.2   | BU6M<br>500                | PAO<br>400 | 4.8/1.00<br>BU6M           | +           |
| 4     | CP5/DMAA-11.3 *<br>28.3   | BU6M<br>250                | LO<br>450  | 159.0/1.08<br>BU6M         | + **        |
| 5     | CP5/DMAA-11.3 *<br>24.3   | BU6M<br>250                | PAO<br>250 | 4.6/0.75<br>BU6M           | -           |
| 6     | CP5/DMAA-5.0 *<br>23.5    | BU6M<br>250                | LO<br>450  | 159.0/1.08<br>BU6M         | + **        |
| 7     | CP5/DMAA-5.0 *<br>23.5    | BU6M<br>250                | PAO<br>250 | 4.6/0.75<br>BU6M           | -           |
| 8     | TP5/DMAA/AA=1/8/1<br>10.0 | BU6M<br>250                | LO<br>250  | 152.5/1.50<br>BU6M         | -           |
| 9     | TP5/DMAA/AA=1/8/1<br>9.2  | BU6M<br>250                | PAO<br>250 | 4.8/0.75<br>BU6M           | -           |
| 10    | CP11a/DMAA-10.0 *<br>17.1 | BU6M<br>250                | LO<br>450  | 152.5/1.50<br>BU6M         | -           |
| 11    | CP11a/DMAA-10.0 *<br>8.8  | BU6M<br>250                | PAO<br>200 | 4.8/1.25<br>BU6M           | -           |
| 12    | CP11b/DMAA-10.0 *<br>15.3 | BU6M<br>250                | LO<br>600  | 46.0/0.60<br>BU6M          | +           |
| 13    | CP11b/DMAA-10.0 *<br>14.7 | BU6M<br>250                | PAO<br>200 | 1.2/0.20<br>BU6M           | +           |
| 14    | CP11c/DMAA-9.9 *<br>13.3  | BU6M<br>250                | LO<br>450  | 152.5/1.50<br>BU6M         | +/-         |
| 15    | CP11c/DMAA-9.9 *<br>16.8  | BU6M<br>250                | PAO<br>200 | 4.8/1.25<br>BU6M           | +           |

\* The code number indicates the percentage of monomers in the reaction feed; \*\* heating; CAO = copper-containing amino oxidases; 5 = 4-aminobutylstyrene hydrochloride; DMAA = *N,N*-dimethylacrylamide; BU6M= borate buffer 0.05 M, Urea 6M; LO = lysyl oxidase; PAO = plasma amine oxidase; 11a = *N*-acryloyl-1,2-diaminoethane hydrochloride; 11b = *N*-acryloyl-1,4-diaminobutane hydrochloride; 11c = *N*-acryloyl-1,6-diaminohexane hydrochloride.

**Table S7.** Size, PDI and ζ-p of CP5/DMAA, CP11b/DMAA, CP11c/DMAA and CPMA/DMAA.

| Entry      | Z AVE (nm)    | PDI   | ζ-p (mV)    |
|------------|---------------|-------|-------------|
| CP5/DMAA   | 334.0 ± 27.0  | 1.012 | +57.6 ± 1.7 |
| CP11b/DMAA | 2590 ± 56.7   | 0.281 | +6.5 ± 3.7  |
| CP11c/DMAA | 372.8 ± 196.8 | 0.326 | +24.8 ± 5.1 |
| CPMA/DMAA  | 112.2 ± 82.8  | 0.590 | +18.3 ± 9.9 |

**Table S8.** Crosslinking of gelatine with copolymers.

| Exp | Gel B (mg) | Solvent (mL) | Copolymer (mg)          | Wt % | Solvent mL                 | CAO mL                    | Gel B Crosslinked (mg, %) |
|-----|------------|--------------|-------------------------|------|----------------------------|---------------------------|---------------------------|
| 1   | 500.1      | BU6M<br>5.0  | CP5/DMAA-43.1<br>50.5   | 10.1 | -                          | LO <sup>§</sup><br>2.0    | M21<br>76.6, 13.9         |
| 2   | 503.1      | BU6M<br>4.0  | CP11b/DMAA-10.0<br>51.5 | 10.2 | BU6M<br>1.0                | LO <sup>†</sup><br>5.0    | M33<br>1.9, 0.38          |
| 3   | 502.7      | BU6M<br>4.0  | CP11c/DMAA-10.0<br>52.4 | 10.4 | BU6M<br>1.0                | PAO <sup>‡</sup><br>0.600 | M31<br>37.3, 7.4          |
| 4   | 500.8      | PB<br>4.0    | CPMA/DMAA-20.0<br>51    | 10.2 | PB<br>2.0                  | -                         | M23<br>498.7, 99.5        |
| 5   | 500.6      | PB<br>4.0    | CPMA/DMAA-20.0<br>25.4  | 5.1  | PB<br>1.0                  | -                         | M26<br>345.5, 69.0        |
| 6   | 500.2*     | PB<br>6.5    | CPMA/DMAA-20.0<br>25.5  | 5.1  | H <sub>2</sub> O mQ<br>1.0 | -                         | M32<br>310.7, 62.1        |
| 7   | 650.1      | BU6M<br>5.2  | CPMA/DMAA-20.0<br>65.0  | 10.0 | BU6M<br>1.5                | LO <sup>#</sup><br>5.2    | M34<br>399.8, 57.2        |

5 = 4-aminobutylstyrene hydrochloride; DMAA = *N,N*-dimethylacrylamide; MA = methacrolein; **11c** = *N*-acryloyl-1,6-diaminohexane hydrochloride; **11b** = *N*-acryloyl-1,4-diaminobutane hydrochloride; LO = lysyl oxidase; PAO = plasma amine oxidase; BU6M = 0.05 M borate buffer, 6M Urea (pH = 8.1 - 8.3); PB (phosphate, pH = 7.8); \* gelatine was added to a hyaluronic acid (HA) solution obtained by dissolving 10.2 mg of HA in 5 mL of phosphate buffer. § 0.5029g /5.0 mL BU6M; ‡ 0.0037g/0.6 mL BU6M; † 0.4092/5.5 mL BU6M; # 0.5254/5.2 mL BU6M.

**Table S9.** UV and NaOH titration of pristine Gel B and of some selected crosslinked derivatives.

| Sample (mg) | CL agent (% *)  | NH <sub>2</sub> /g (UV) (mmol) | NH <sub>2</sub> /g (NaOH) (mmol) | Crosslinking (%) |
|-------------|-----------------|--------------------------------|----------------------------------|------------------|
| Gel B       |                 |                                |                                  |                  |
| 11.2        | -               | 0.219±0.02                     | -                                | -                |
| 251.3       | -               | -                              | 0.391±0.03                       | -                |
| M21         | CP5/DMAA-43.1   |                                |                                  |                  |
| 11.4        | 10.1            | 0.065±0.001                    | -                                | 70.5             |
| M31         | CP11c/DMAA-10.0 |                                |                                  |                  |
| 11.9        | 10.4            | 0.208±0.04                     | -                                | 5.0              |
| 220.1       | 10.4            | -                              | 0.372±0.03                       | 4.9              |
| M23         | CPMA/DMAA-20.0  |                                |                                  |                  |
| 11.4        | 10.2            | 0.207±0.03                     | -                                | 5.5              |
| 222.9       | 10.2            | -                              | 0.157±0.02                       | 59.8             |
| M26         | CPMA/DMAA-20.0  |                                |                                  |                  |
| 11.6        | 5.1             | 0.225±0.02                     | -                                | ≈ 0              |
| 221.9       | 5.1             | -                              | 0.190±0.01                       | 51.4             |
| M32         | CPMA/DMAA-20.0  |                                |                                  |                  |
| 12.9        | 5.1             | 0.174±0.01                     | -                                | 20.5             |
| 220.5       | 5.1             | -                              | 0.164±0.01                       | 58.1             |
| M34         | CPMA/DMAA-20.0  |                                |                                  |                  |
| 11.5        | 10.0            | 0.118±0.015                    | -                                | 46.1             |

CL = Crosslinking; \* % wt/wt with Gel B.

**Table S10.** Experimental data of the synthesis of compounds **6a, b**.

| Entry<br>(g, mmol, mL)                  | DCM<br>(mL) | Boc <sub>2</sub> O<br>(g, mmol) | Time<br>(h) | Side product<br>(g, mmol, %)    | Product<br>(g, mmol, %)        | Physical state   |
|-----------------------------------------|-------------|---------------------------------|-------------|---------------------------------|--------------------------------|------------------|
| 1,2-ethylenediamine<br>5.39, 89.68, 6.0 | 50 *        | 4.90, 22.45                     | 21          | <b>7a</b><br>0.6067, 2.33, 10.4 | <b>6a</b><br>2.64, 16.45, 73.3 | Light-yellow oil |
| 1,4-diaminobutane<br>6.14, 69.65, 7.0   | 70 *        | 3.80, 17.39                     | 21          | <b>7b</b><br>0.3896, 1.35, 7.8  | <b>6b</b><br>3.13, 16.64, 95.7 | Yellow oil       |

Boc<sub>2</sub>O = *t*-butyl-di-carbonate; \* for dissolving diamines; \*\* for dissolving Boc<sub>2</sub>O.**Table S11.** Experimental data of the synthesis of compounds **10a-c**.

| Entry<br>(g, mmol)       | Solvent<br>(mL)   | Acryloyl chloride<br>(g, mmol, mL) | TEA<br>(g, mmol, mL) | Time<br>(min)      | Product<br>(g, mmol, %)         | Physical state |
|--------------------------|-------------------|------------------------------------|----------------------|--------------------|---------------------------------|----------------|
| <b>6a</b><br>2.17, 13.57 | 32.5 *<br>16.5 ** | 1.43, 16.29, 1.35                  | 1.37, 13.57, 1.9     | 90 ***/135 °       | <b>10a</b><br>2.51, 11.71, 86.3 | Solid          |
| <b>6b</b><br>3.01, 16.01 | 38.0 *<br>19.5 ** | 1.7, 19.21, 1.6                    | 1.6, 16.01, 2.2      | 45 ***/120 °       | <b>10b</b><br>3.26, 13.45, 84.1 | Solid          |
| <b>6c</b><br>3.04, 14.05 | 34.0 *<br>17.0 ** | 1.53, 16.86, 1.4                   | 1.42, 14.05, 1.95    | 90 ***/overnight ° | <b>10c</b><br>3.03, 11.21, 79.8 | Solid          |

TEA = triethylamine; \* for dissolving acryloyl chloride; \*\* for dissolving compounds **6a-c**; \*\*\* for the dropwise adding of TEA and **6a-c** solution; ° reaction time.**Table S12.** Experimental data of the synthesis of monomers **11a-c**.

| Entry<br>(g, mmol)        | EtOAc<br>(mL) | HCl 3N<br>(mL) | HCl 37%<br>(mL)  | Time<br>(min) | Product<br>(g, mmol, %)         | Physical state |
|---------------------------|---------------|----------------|------------------|---------------|---------------------------------|----------------|
| <b>10a</b><br>2.90, 15.50 | ---           | 7.5            | ---              | 80 °          | <b>11a</b><br>1.77, 11.80, 76.1 | Solid          |
| <b>10b</b><br>1.60, 6.61  | 20            | ---            | Needed to pH = 1 | N.R. °        | <b>11b</b><br>0.97, 5.50, 83.2  | Solid *        |
| <b>10c</b><br>2.98, 11.02 | ---           | 12             | ---              | 60 °          | <b>11c</b><br>2.25, 10.87, 98.6 | Solid          |

° Reaction time; \* for characterization the dark solid was recrystallized by acetonitrile (CH<sub>3</sub>CN).**Table S13.** Copolymerization reactions of **10a, 10b** and **11c** with DMAA a 60 °C.

| Entry      | mg (mmol)    | DMAA<br>(g, mmol) | M <sub>m</sub> | AIBN<br>(mg, %) | MeOH<br>(mL) | Time<br>(min) | Copolymer  | (g, %)      |
|------------|--------------|-------------------|----------------|-----------------|--------------|---------------|------------|-------------|
| <b>10a</b> | 201.1 (0.94) | 0.84, 8.47        | 0.0997         | 10.4, 1.00      | 7.0          | 290           | CP10a/DMAA | 0.658, 63.2 |
| <b>10a</b> | 200.0 (0.93) | 0.88, 8.40        | 0.0997         | 10.5, 0.97      | 7.0          | 210           | CP10a/DMAA | 0.749, 69.4 |
| <b>10b</b> | 200.3 (0.83) | 0.74, 7.47        | 0.0997         | 9.68, 1.03      | 6.5          | 270           | CP10b/DMAA | 0.435, 46.3 |
| <b>10b</b> | 400.6 (1.65) | 1.47, 14.85       | 0.1000         | 18.7, 1.00      | 13.0         | 270           | CP10b/DMAA | 1.458, 79.8 |
| <b>11c</b> | 100.9 (0.49) | 0.44, 4.44        | 0.0994         | 5.46, 1.01      | 3.0          | 150           | CP11c/DMAA | 0.478, 94.7 |
| <b>11c</b> | 201.0 (0.97) | 0.88, 8.75        | 0.0998         | 11.0, 1.02      | 4.0          | 210           | CP11c/DMAA | 0.819, 76.1 |

DMAA = *N, N'*-di-methylacrylamide; M<sub>m</sub> = molar fractions of the monomers into the feed; AIBN = 2,2'-azo-bis-(2-methylpropane nitrile).**Table S14.** Boc deprotection of copolymers CP10a/DMAA e CP10b/DMAA.

| Copolymer  | g     | HCl 3N* (mL) | Time(h) | Product    | g, %        |
|------------|-------|--------------|---------|------------|-------------|
| CP10a/DMAA | 0.337 | 3.3          | 4       | CP11a/DMAA | 0.277, 82.2 |
| CP10a/DMAA | 0.406 | 4.0          | 4       | CP11a/DMAA | 0.261, 64.3 |
| CP10b/DMAA | 0.267 | 2.0          | 4       | CP11b/DMAA | 0.180, 67.4 |
| CP10b/DMAA | 0.396 | 4.0          | 4       | CP11b/DMAA | 0.376, 94.9 |

\* in EtOAc; DMAA = *N, N'*-di-methylacrylamide.
